# Supplementary material for: Large Nernst power factor over a broad temperature range in polycrystalline Weyl semimetal NbP
Source: Royal Society of Chemistry journal article supplement (doi:10.1039/c8ee02077a), 2018-01-01
Supplement: c8ee02077a1.pdf [file c8ee02077a1.pdf]

## *Electronic Supplementary Information (ESI)*

### **Large Nernst Power Factor over a Broad Temperature Range in Polycrystalline Weyl Semimetal NbP**

Chenguang Fu,<sup>\*‡<sup>a</sup></sup> Satya N. Guin,<sup>‡<sup>a</sup></sup> Sarah J. Watzman,<sup>a,b</sup> Guowei Li,<sup>a</sup> Enke Liu,<sup>a</sup> Nitesh Kumar,<sup>a</sup> Vicky Süß,<sup>a</sup> Walter Schnelle,<sup>a</sup> Gudrun Auffermann,<sup>a</sup> Chandra Shekhar,<sup>a</sup> Yan Sun,<sup>a</sup> Johannes Gooth,<sup>a</sup> and Claudia Felser<sup>\*<sup>a</sup></sup>

<sup>a</sup>*Max Planck Institute for Chemical Physics of Solids, Nöthnitzer Str. 40, 01187 Dresden, Germany*

<sup>b</sup>*Department of Mechanical and Aerospace Engineering, The Ohio State University, Columbus, OH 43210, USA*

*E-mail: Chenguang.Fu@cpfs.mpg.de, Claudia.Felser@cpfs.mpg.de*

*‡These authors contributed equally.*

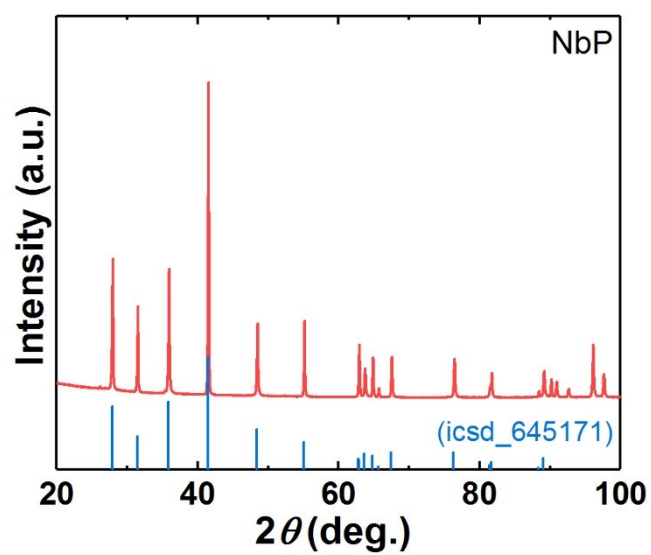

Fig. S1 Powder XRD pattern for NbP with simulated pattern.

Table S1. Relative density of bulk NbP under different sintering temperatures.

| Bulk NbP sample | Uniaxial pressure<br>(MPa) | Sintering temperature<br>(°C) | Relative density |
|-----------------|----------------------------|-------------------------------|------------------|
| S1              | 80                         | 800                           | 59%              |
| S2              | 80                         | 920                           | 65%              |
| S3              | 80                         | 970                           | 71%              |
| S4              | 80                         | 1150                          | 91%              |
| S5              | 80                         | 1200                          | 91%              |

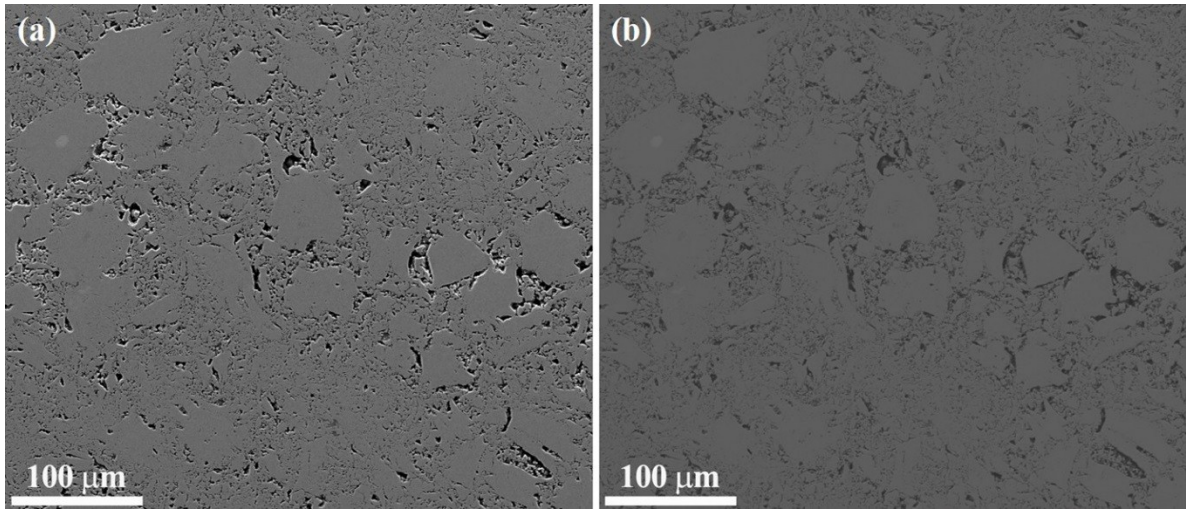

**Fig. S2** SEM secondary electron image (a) and back scattered (BS-SEM) image (b) for polycrystalline NbP.

Table S2. Atomic percentage of NbP sample at 8 randomly selected positions detected by Energy-dispersive X-ray spectroscopy (EDX).

| element | Position 1 | Position 2 | Position 3 | Position 4 | Position 5 | Position 6 | Position 7 | Position 8 |
|---------|------------|------------|------------|------------|------------|------------|------------|------------|
| Nb      | 49.43%     | 49.44%     | 49.73%     | 49.88%     | 49.69%     | 49.47%     | 49.94%     | 49.31%     |
| P       | 50.57%     | 50.56%     | 50.27%     | 50.12%     | 50.31%     | 50.53%     | 50.06%     | 50.69%     |

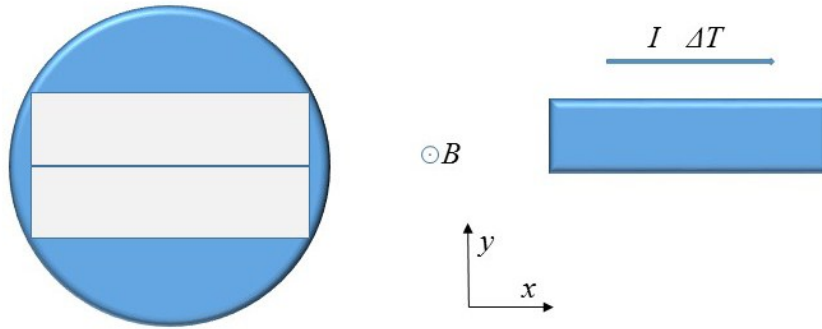

**Fig. S3** Schematically showing the as-sintered bulk sample. The thermal gradient ( $\Delta T$ ) and current ( $I$ ) were applied along longer direction of the sample. The magnetic field ( $B = \mu_0 H$ ) was applied parallel to the width of the sample during the transport measurement.

## Definition of parameters

The Seebeck and Nernst effects are longitudinal and transverse thermoelectric responses, respectively. In order to make the description clear in the main text, here we first give a definition of all the transport parameters and their respective directions. The bulk sample of NbP after SPS is cylindrical. We define the height direction as the  $z$ -axis, while the plate face is the  $xy$ -plane, as shown in Figure S3. For a polycrystalline sample, there are should be no obvious differences in transport properties in-plane; thus, we consider the sample isotropic. Two bar-shaped samples are cut for transport measurements. We define the length direction as the  $x$ -axis while the width direction is the  $y$ -axis. The temperature gradient  $\Delta T$  is applied along the  $x$ -axis while the magnetic field  $B$  is applied along the  $z$ -axis. The transport parameters are defined as shown in Table S3.

Table S3. Definition of the transport parameters.

| Symbol                                 | Transport parameter                                        | Symbol                                          | Transport parameter                                               |
|----------------------------------------|------------------------------------------------------------|-------------------------------------------------|-------------------------------------------------------------------|
| $\alpha_{xx}$                          | Seebeck thermopower ( $\mu\text{V}/\text{K}$ )             | $\alpha_{xy}$                                   | Nernst thermopower ( $\mu\text{V}/\text{K}$ )                     |
| $\rho_{xx}$                            | Electrical resistivity ( $\Omega \text{ cm}$ )             | $\rho_{xy}$                                     | Hall resistivity ( $\Omega \text{ cm}$ )                          |
| $\sigma_{xx}, \sigma_{yy}$             | Electrical conductivity ( $\Omega^{-1} \text{ cm}^{-1}$ )  | $\sigma_{xy}$                                   | Hall conductivity ( $\Omega^{-1} \text{ cm}^{-1}$ )               |
| $\kappa_{xx}$                          | Thermal conductivity ( $\text{W m}^{-1} \text{ K}^{-1}$ )  |                                                 |                                                                   |
| $PF = \alpha_{xx}^2 \cdot \sigma_{xx}$ | Power factor ( $10^{-4} \text{ W m}^{-1} \text{ K}^{-2}$ ) | $PF_{Nernst} = \alpha_{xy}^2 \cdot \sigma_{yy}$ | Nernst power factor ( $10^{-4} \text{ W m}^{-1} \text{ K}^{-2}$ ) |
| $zT$                                   | Thermoelectric figure of merit                             | $zT_{Nernst}$                                   | Nernst figure of merit                                            |

The longitudinal and Hall conductivities are related to the resistivities via:

$$\sigma_{xx} = \frac{\rho_{xx}}{\rho_{xx}^2 + \rho_{xy}^2} \quad \text{and} \quad \sigma_{xy} = -\frac{\rho_{xy}}{\rho_{xx}^2 + \rho_{xy}^2} \quad (1)$$

The thermoelectric figure of merit  $zT_S$  is calculated according to the expression:

$$zT = \frac{\alpha_{xx}^2 \sigma_{xx}}{\kappa_{xx}} T \quad (2)$$

The Nernst figure of merit  $zT_{Nernst}$  is calculated using the formula:

$$zT_{Nernst} = \frac{\alpha_{xy}^2 \sigma_{yy}}{\kappa_{xx}} T \quad (3)$$

For the sample, transport are considered  $\sigma_{yy}$ .

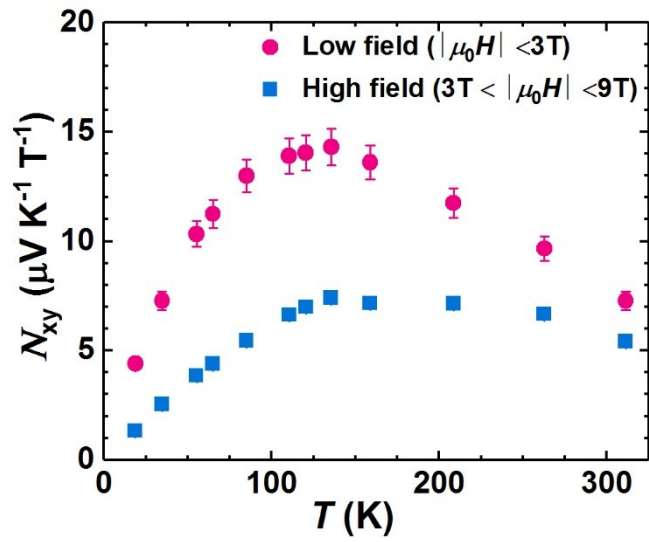

polycrystalline parameters in-plane isotropic, thus  $\sigma_{xx} =$

**Fig. S4** Nernst coefficient versus temperature at low magnetic field ( $\mu_0 H$ ) and high-  $\mu_0 H$  region for polycrystalline NbP.

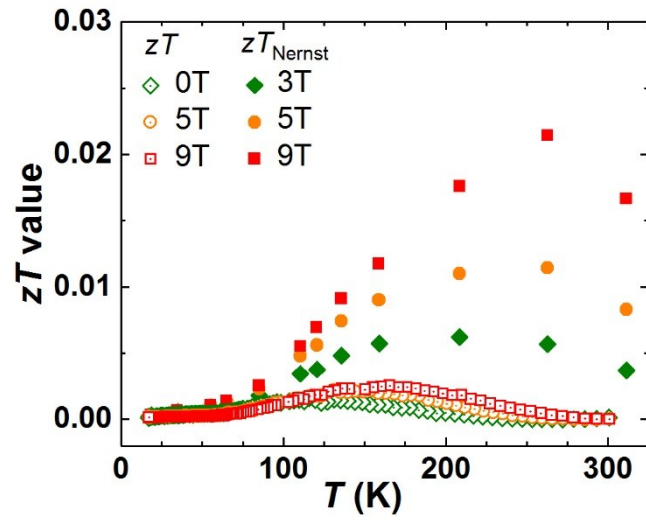

**Fig. S5** Temperature dependent  $zT$  and  $zT_{\text{Nernst}}$  for polycrystalline NbP at different magnetic fields.
